# Supplementary material for: Systematic investigation on the coordination chemistry of a sulfonated monoazo dye: Ligand-dominated d- and f-block derivatives
Source: Royal Society of Chemistry journal article supplement (doi:10.1039/b814774d), 2009-01-01
Supplement: b814774d.pdf [file b814774d.pdf]

## **Electronic Supplementary Information (ESI)**

### **Systematic Investigation on the Coordination Chemistry of a Sulfonated Monoazo Dye:**

#### **Ligand Dominated d- and f-Block Derivatives**

Jian Lü,<sup>a</sup> Shui-Ying Gao,<sup>a</sup> Jing-Xiang Lin,<sup>a</sup> Lin-Xi Shi,<sup>a</sup> Rong Cao,<sup>\*a</sup> and Stuart R. Batten<sup>b</sup>

<sup>a</sup>State Key Laboratory of Structural Chemistry, Fujian Institute of Research on the Structure of Matter, Chinese Academy of Sciences, Fujian, Fuzhou, 350002, P. R. China; <sup>b</sup>School of Chemistry, Monash University 3800, Australia

**Table S1** Hydrogen bond lengths (Å) for compounds **1-5**.

---

| <b>Compound 1</b>               |       |                                          |       |
|---------------------------------|-------|------------------------------------------|-------|
| N(1)-H(4A)···O(1)W              | 2.792 | N(4)-H(4E)···O(4)W                       | 2.753 |
| O(2) <sub>W</sub> -H(1D)···O(2) | 2.844 | O(2) <sub>W</sub> -H(1C)···O(6)          | 2.876 |
| O(3) <sub>W</sub> -H(1E)···O(3) | 2.914 | O(2) <sub>W</sub> -H(1H)···O(5)          | 2.846 |
| <b>Compound 2</b>               |       |                                          |       |
| N(4)-H(1X)···O(1)               | 3.024 | N(4)-H(1F)···O(1)W                       | 2.804 |
| N(4)-H(1C)···O(5)               | 2.930 | O(1) <sub>W</sub> -H(1E)···O(6)          | 2.722 |
| O(2) <sub>W</sub> -H(1I)···O(4) | 2.838 | O(1) <sub>W</sub> -H(1D)···O(4)          | 2.893 |
| <b>Compound 3a</b>              |       |                                          |       |
| O(1) <sub>W</sub> -H···O(2)     | 2.740 | O(1) <sub>W</sub> -H···O(3)              | 2.744 |
| N(1)-H···O(2)                   | 3.087 |                                          |       |
| <b>Compound 3b</b>              |       |                                          |       |
| O(1) <sub>W</sub> -H···O(1)     | 2.740 | O(1) <sub>W</sub> -H···O(2)              | 2.759 |
| N(1)-H···O(3)                   | 3.046 |                                          |       |
| <b>Compound 3c</b>              |       |                                          |       |
| O(1) <sub>W</sub> -H···O(2)     | 2.776 | O(1) <sub>W</sub> -H···O(3)              | 2.672 |
| N(1)-H···O(3)                   | 3.031 |                                          |       |
| <b>Compound 3d</b>              |       |                                          |       |
| O(1) <sub>W</sub> -H···O(2)     | 2.734 | O(1) <sub>W</sub> -H···O(3)              | 2.767 |
| N(1)-H···O(2)                   | 3.098 |                                          |       |
| <b>Compound 3e</b>              |       |                                          |       |
| O(1) <sub>W</sub> -H···O(1)     | 2.742 | O(1) <sub>W</sub> -H···O(2)              | 2.733 |
| N(1)-H···O(2)                   | 3.066 |                                          |       |
| <b>Compound 3f</b>              |       |                                          |       |
| O(1) <sub>W</sub> -H···O(2)     | 2.771 | O(1) <sub>W</sub> -H···O(3)              | 2.719 |
| N(1)-H···O(2)                   | 3.024 |                                          |       |
| <b>Compound 5a</b>              |       |                                          |       |
| O(3) <sub>W</sub> -H···O(9)     | 2.840 | O(3) <sub>W</sub> -H···O(2)              | 2.950 |
| O(2) <sub>W</sub> -H···O(3)     | 2.837 | O(1) <sub>W</sub> -H···O(2) <sub>W</sub> | 2.688 |
| O(1) <sub>W</sub> -H···O(5)     | 2.731 | O(2) <sub>W</sub> -H···O(6)              | 2.788 |
| <b>Compound 5c</b>              |       |                                          |       |
| O(3) <sub>W</sub> -H···O(5)     | 2.901 | O(3) <sub>W</sub> -H···O(8)              | 2.852 |
| O(1) <sub>W</sub> -H···O(2)     | 2.753 | O(1) <sub>W</sub> -H···O(4) <sub>W</sub> | 2.659 |
| O(4) <sub>W</sub> -H···O(3)     | 2.770 | O(4) <sub>W</sub> -H···O(6)              | 2.846 |

---

**Fig. S1** XRPD patterns of complexes La/Pr/Nd/Sm-L, showing the identical characteristics of the samples.

**Fig. S2** Simulated and experimental XRPD patterns of **5c**, and a comparison of experimental XRPD patterns of **5b** and **5c**.

**Fig. S3** IR spectra on CaF<sub>2</sub> slides of PEI-BW<sub>12</sub> (a), PEI-BW<sub>12</sub>/**5c-Ho** (b), and PEI-(PW<sub>12</sub>/**5c-Ho**)<sub>6</sub> (c).

**Fig. S4** AFM images of **5c** on mica slide.

**Fig. S5** UV-vis spectra of the PEI-(PEG/**5c-Ho**)<sub>n</sub> multilayer films on a quartz slide.

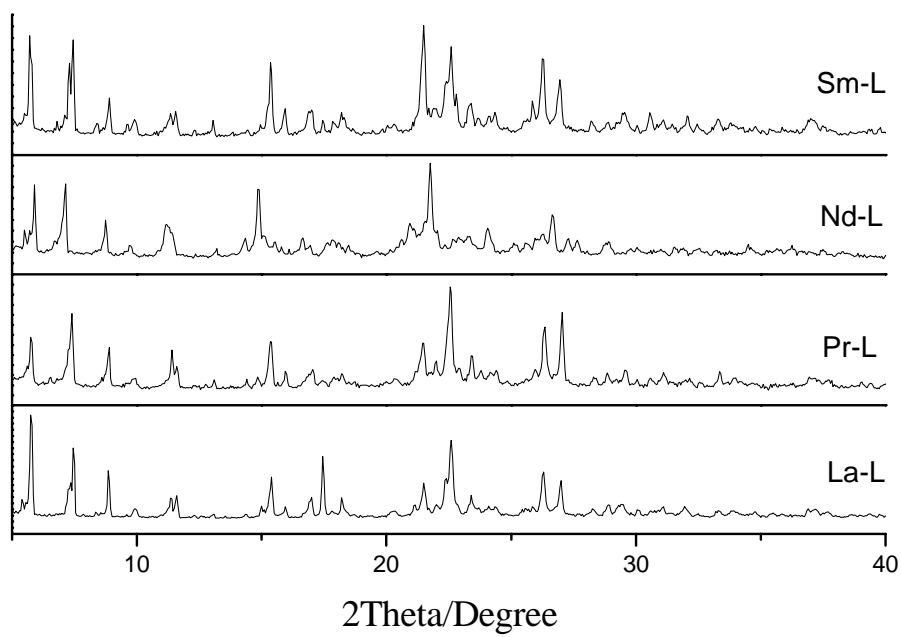

**Fig. S1**

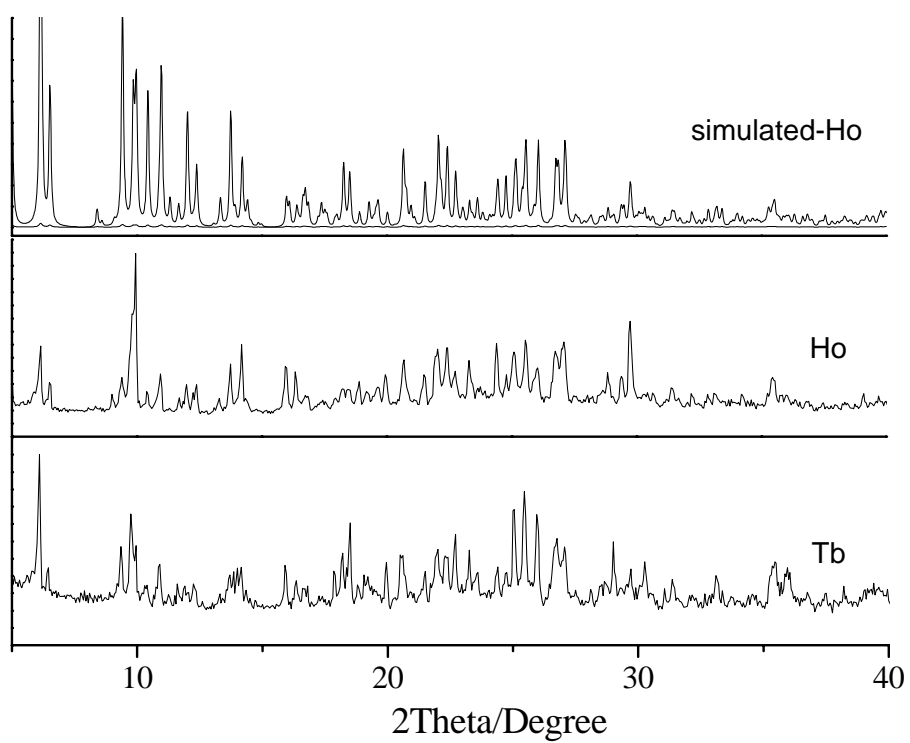

**Fig. S2**

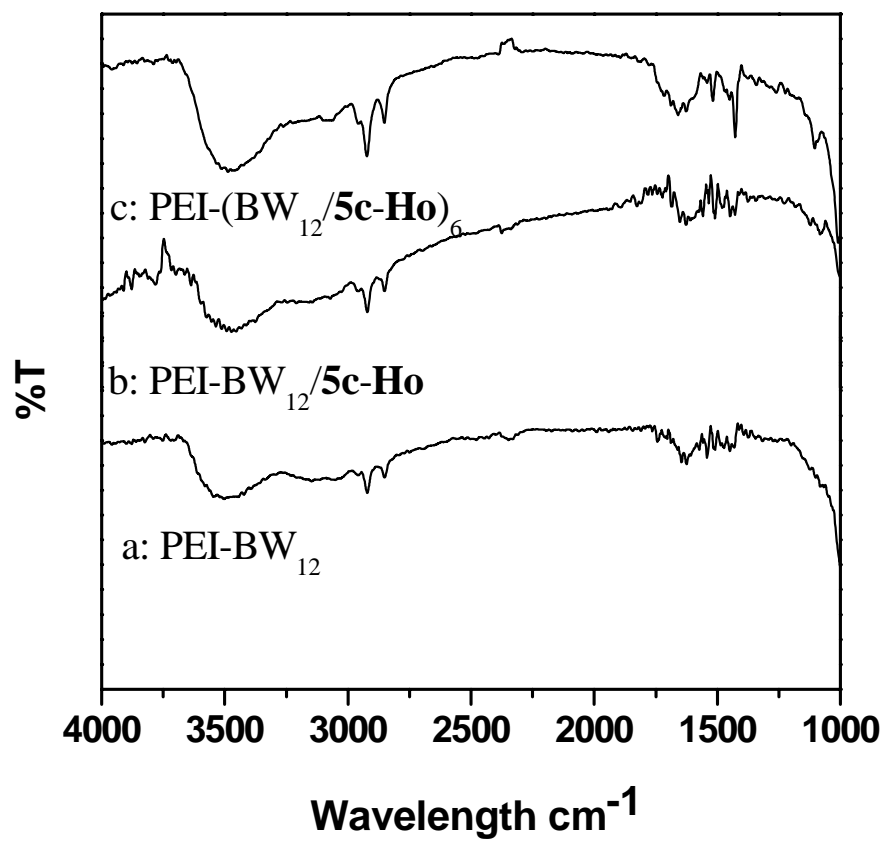

Fig. S3

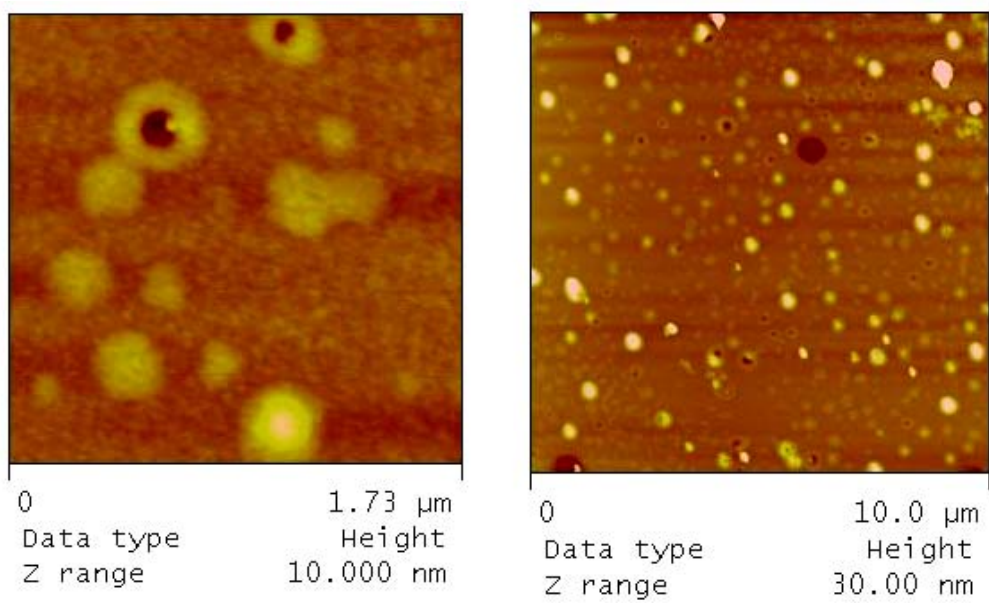

**Fig. S4**

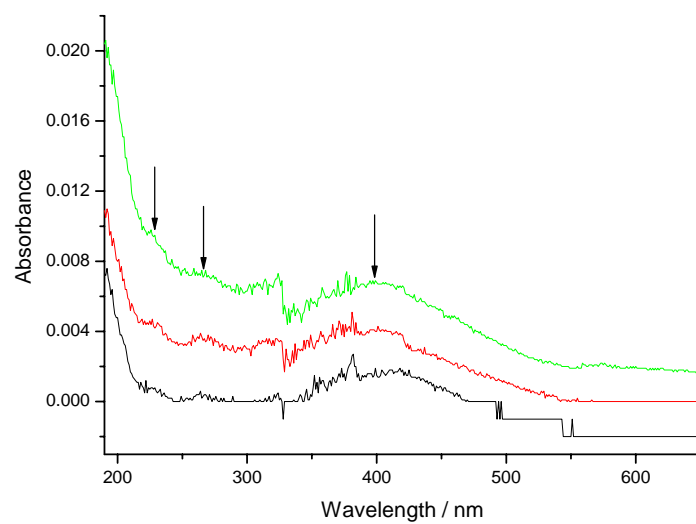

**Fig. S5**
